# Supplementary material for: Brockarchaeota, a novel archaeal phylum with unique and versatile carbon cycling pathways
Source: PubMed Central journal article supplement (PMC8065059; doi:10.1038/s41467-021-22736-6), 2021-04-23
Supplement: 41467_2021_22736_MOESM2_ESM.pdf [file 41467_2021_22736_MOESM2_ESM.pdf]

## Description of Additional Supplementary Files

File Name: Supplementary Data 1

Description: *Excel File*. Sheet Data: Physicochemical characteristics of samples where the MAGs in this study were obtained. n.a: not available data. Sheet Stats: Extended genomic statistics described in Table 1

File Name: Supplementary Data 2

Description: *Excel file*. Relative abundance of the microbial community samples where Brockarchaeota MAGs were recovered. The relative abundance of the MAGs from deep sea samples was obtained from Supplementary Data 3 in Dombrowski et al., 2018. Only samples G9 and G7 are shown, and the data is sorted according to the relative abundance of those corresponding samples. Guaymas samples and includes post publication manual refinement in the taxonomy according to the recent archaea tree of life Baker et al., 2020. The relative abundance of MAGs from Tengchong samples was computed using MetaGaia a bin\_abundance.py script (<https://github.com/valdeanda/MetaGaia>). Briefly, for each MAG, total length of mapped reads for individual scaffolds (mapped reads using BWA algorithm) is summed up and the total is then divided by the MAG size in bp. This number is then divided by the total number of reads to obtain the relative abundance. The final relative abundance is multiply it by 100000000 for readability purposes. For the Tibet samples, the genome bins obtained for a given sample, the sequencing coverage was determined by read mapping using Bowtie2 and coverage calculation using the jgi\_summarize\_bam\_contig\_depths script from MetaBAT (Kang et al., 2015. PeerJ). The relative abundance of a given genome bin was calculated as its sequencing coverage divided by the total sequencing coverage of all genome bins in the corresponding sample. Tengchong samples are described in Hua et al., 2018

File Name: Supplementary Data 3

Description: *Plain text file*. Archaea tree file for the maximum likelihood phylogenetic tree of 3577 archaeal and 40 bacterial genomes based on 37 concatenated protein-coding genes previously described in Baker et al., 2020 Nat. Microbiol (<https://doi.org/10.1038/s41564-020-0715-z>)

File Name: Supplementary Data 4

Description: *Excel File* Selected 250 publicly available TACK genomes including 15 Brockarchaeota genomes reported in this study.

File Name: Supplementary Data 5

Description: *Excel File*. Sheet 1. Average amino acid identity (AAI) comparison of Brockarchaeota genomes and phylogenetically related TACK phyla. Sheet 2. Selected TACK genomes closely related to Brockarchaeota genomes. (Geoarchaeota, Aigarchaeota, Korarchaeota and Thaumarchaeota). See Supplementary Figure 1. The color code indicates the AAI (%) from 0-100 (green to red respectively).

File Name: Supplementary Data 6

Description: *Excel File*, Metabolism sheet: Overview of key metabolic genes found in Brockarchaeota genomes using KofamKOALA. Only hits above the predefined threshold for individual KOs were selected. Raw sheet contains the raw annotations obtained with KofamKOALA including the specific scaffolds for each annotation. MT system sheet contains the

selected genes for the MT system and fold proteins detected with Interproscan v5.31-70.0. Metabolic Marker genes sheet contains the reference and absence profile of selected marker genes obtained from METABOLIC (Zhou et al., 2019). MEBS completeness sheet shows the completeness of PFAM domains in TACK genomes showed in Figure 1. MEBS mapping File sheet contains the full repertoire of protein domains involved in specific metabolic processes.

File Name: Supplementary Data 7

Description: *Plain text file*. Fasta file containing the 16S rRNA gene sequences identified in Brockarchaeota MAGs. Sequences were extracted using and barnap (<https://github.com/tseemann/barnap>, v0.8, settings: --kingdom arc/bac --lencutoff 0.2 --reject 0.3 --evaluate 1e-05).

File Name: Supplementary Data 8

Description: *Excel file* Metadata and geographic locations of 16S rRNA gene sequences related to Brockarchaeota genomes obtained from the Integrated Microbial Genomes and Microbiomes (IMG/M) database (<https://img.jgi.doe.gov/>).

File Name: Supplementary Data 9

Description: *Excel file Excel file*. Predicted transcription units of the scaffolds were methanol-cobalamin methyltransferases (MtaB), trimethylamine-corrinoid protein methyltransferase (MttB) and B12-binding corrinoid proteins were found in Brockarchaeota genomes. The operon prediction based on intergenic distance of neighboring genes as well as the functional relationships of their protein coding products was computed with Operon Mapper (Taboada et al., 2018).

File Name: Supplementary Data 10

Description: *Excel file*. Description of the common core marker genes specific to methanogenic, anaerobic methanotrophic and short-chain alkane-oxidizing archaea described in Borrel et al., 2019, across the TACK superphylum. Sheet 2 includes the raw data with the scaffolds encoding the specific marker genes and corresponding E values. Presence and absence profile of common core marker genes specific to methanogenesis across the TACK superphylum. Genes include those associated to methanogenesis, anaerobic methanotrophic and short-chain alkane-oxidizing archaea described in Borrel et al., 2019. For comparison purposes the following known methanogenic archaea were included: *Candidatus Methanoplasma termitum* that lacks the entire pathway for CO<sub>2</sub> reduction to methyl coenzyme M and produces methane by hydrogen-dependent reduction of methanol or methylamine (Methanomassiliicoccales), *Methanosphaera stadtmanae* (Methanobacteriales) that can generate methane only by the reduction of methanol with H<sub>2</sub> and is dependent on acetate as a carbon source, and *Methanosarcina acetivorans* (Methanosarcinales). Predicted transcription units of the scaffolds were methylenetetrahydrofolate reductase (NADPH) [EC:1.5.1.20] was found in Brockarchaeota genomes (JZZ-4 and JZ-1.89 sheets respectively). The operon prediction based on intergenic distance of neighboring genes as well as the functional relationships of their protein coding products was computed with Operon Mapper (Taboada et al., 2018).

File Name: Supplementary Data 11

Description: *Excel file*. Metagenomic screening of Methyl-coenzyme M reductase (MCR) genes in metagenomic assemblies from which Brockarchaeota genomes were recovered.

File Name: Supplementary Data 12

Description: *Excel File*. Total number of carbohydrate-active enzymes (CAZymes) detected in Brockarchaeota and TACK superphylum. Sheet 1. Number of total CAZYMes in Brockarchaeota genomes. Sheet 2 contains the raw output from the dbCAN webserver and PSORT results. Sheet 3 Comparison of unique and shared CAZYMes across members of the TACK

superphylum. Only hits detected in more than two tools were selected for domain assignment. Total number of carbohydrate-binding modules (CBMs), carbohydrate esterases (CE), glycoside hydrolases (GH) and polysaccharide lyases (PL). Subcellular localization for CEs, GHs and PLs was determined using PSORTb.

File Name: Supplementary Data 13

Description: *Excel file*. Total number of peptidases detected in each Brockarchaeota genome. Total number of peptidases identified using the MEROPS v12.1 peptidase database. Subcellular localization for individual peptidases was determined using PSORTb.
